# Supplementary material for: Development and validation of the Cannabis Exposure in Pregnancy Tool (CEPT): a mixed methods study
Source: Springer Nature journal article supplement (doi:10.1186/s12884-024-06485-0), 2024-04-16
Supplement: MOESM1 [file 12884_2024_6485_MOESM1_ESM.pdf]

\* notes in red do not appear in user version

# CEPT - Cannabis Exposure in Pregnancy Tool

We understand that some people choose to use cannabis in pregnancy, and we would like to learn more about them. We want to help ensure that everyone receives the best prenatal care possible.

Please answer about your current pregnancy only. If you are not pregnant, answer about your most recent pregnancy.

1. How many weeks pregnant are you today? {dropdown of weeks}  I am not currently pregnant
2. During your current/most recent pregnancy how often would you say you were exposed to second-hand cannabis smoke or cannabis vapour while in the same room as the person using it? **\*if never, skip to 4**
- | Never                 | A few times, but less than once per month | About monthly         | About weekly          | Daily or almost daily | Multiple times per day |
|-----------------------|-------------------------------------------|-----------------------|-----------------------|-----------------------|------------------------|
| <input type="radio"/> | <input type="radio"/>                     | <input type="radio"/> | <input type="radio"/> | <input type="radio"/> | <input type="radio"/>  |
3. If you were exposed to second hand cannabis smoke or cannabis vapour while talking or hanging out with the person using, at what time(s) in your current/most recent pregnancy were you exposed? (select all that apply)
- | 1st Trimester         | 2nd Trimester         | 3rd Trimester         | Unsure                |
|-----------------------|-----------------------|-----------------------|-----------------------|
| <input type="radio"/> | <input type="radio"/> | <input type="radio"/> | <input type="radio"/> |
4. At what time(s) in your current pregnancy, so far, did you use cannabis or cannabis products?(Select all that apply). **\*if 'didn't use', skip to 7 and END**
- | I didn't use cannabis | I quit when I found out I was pregnant coded as 1st Tri. | 1st Trimester         | 2nd Trimester         | 3rd Trimester         |
|-----------------------|----------------------------------------------------------|-----------------------|-----------------------|-----------------------|
| <input type="radio"/> | <input type="radio"/>                                    | <input type="radio"/> | <input type="radio"/> | <input type="radio"/> |
5. During your your (indicate trimester from item 4) how often would you say you used cannabis or cannabis products for either medical or non-medical purposes? **\*Item 5 repeats for each period indicated in item 4**
- | Once or twice         | A few times, but less than once per month | About monthly         | About weekly          | Daily or almost daily | Multiple times per day |
|-----------------------|-------------------------------------------|-----------------------|-----------------------|-----------------------|------------------------|
| <input type="radio"/> | <input type="radio"/>                     | <input type="radio"/> | <input type="radio"/> | <input type="radio"/> | <input type="radio"/>  |
6. During your current/most recent pregnancy, if you used any cannabis or cannabis products, it was mainly:
- |                                             |                                               |                                                            |
|---------------------------------------------|-----------------------------------------------|------------------------------------------------------------|
| <input type="radio"/> To help with pain     | <input type="radio"/> For enjoyment           | <input type="radio"/> To help with morning sickness/nausea |
| <input type="radio"/> To help with appetite | <input type="radio"/> To relax                | <input type="radio"/> For seizures                         |
| <input type="radio"/> To help with sleep    | <input type="radio"/> To help with depression | <input type="radio"/> Other (please specify)               |
|                                             | <input type="radio"/> To help with anxiety    |                                                            |
7. Does your partner consume cannabis or cannabis products?
- |                                                        |                                      |                                      |                          |
|--------------------------------------------------------|--------------------------------------|--------------------------------------|--------------------------|
| <input type="radio"/> I don't currently have a partner | <input type="radio"/> Yes, sometimes | <input type="radio"/> Yes, regularly | <input type="radio"/> No |
|--------------------------------------------------------|--------------------------------------|--------------------------------------|--------------------------|
8. During your current/most recent pregnancy if you used cannabis or cannabis products, in what form did you use them?
- Smoked dried buds/flowers/leaves (Pipe and/or joints etc)
  - Vaped
  - Ate or drank products with THC (edibles, mist, tinctures, capsules or pills)
  - Ate or drank products with CBD only (edibles, mist, tinctures, capsules or pills)
  - Applied skin products with THC (cream, patch, lip-balm etc.)
  - Applied skin products with CBD only (cream, patch, lip-balm etc.)
  - Used shatter, budder, hash, oil, rosin or other concentrated product
  - Other (please specify)

The next questions ask about how much cannabis or cannabis product you use at a time. Please select the amounts that correspond to each type of cannabis product you said you used in the last question.

Answer separately for each type of cannabis product, indicating your best guess of how much you would use at one time.

\*Items 9a-9i appear for only those categories selected in item 8

**9a. If you smoked dried cannabis, how much would you say you smoked each time? (your best guess is okay)**

- 1 to less than 5 inhalations/puffs
- 5 inhalations to less than 1/8 gram (pea-sized)
- 1/8 gram to less than 1/4 gram (blueberry-sized)
- 1/4 gram to less than 1/2 gram (grape-sized)
- 1/2 gram to less than 1 gram (1- 1.5 grapes)
- 1 gram or more

**9b. If you vaped cannabis bud or juice, *not concentrate/distillate/budder/hash/oil* how much would you say you vaped each time? (your best guess is okay)**

- 1 or 2 inhalations (puffs)
- 3 inhalations (puffs) to less than 5 inhalations/puffs
- 5 inhalations/puffs to less than 1/8 cartridge/pen
- 1/8 to less than 1/4 cartridge/pen
- 1/4 cartridge/pen to less than 1/2 cartridge/pen
- 1/2 cartridge/pen or more

**9c. If you ate or drank cannabis product containing THC (i.e. edibles, tea/drinks, mist, pill, capsule), how much would you say you consumed each time? (your best guess is okay)**

- |                       |                       |                       |                       |                       |
|-----------------------|-----------------------|-----------------------|-----------------------|-----------------------|
| Less than 10mg<br>THC | 10 to 30 mg<br>THC    | 31 to 60 mg<br>THC    | 61 to 120<br>mg THC   | Over 120mg<br>THC     |
| <input type="radio"/> | <input type="radio"/> | <input type="radio"/> | <input type="radio"/> | <input type="radio"/> |

**9d. If you ate or drank cannabis product containing CBD only (i.e. edibles, tea/drinks, mist, pill, capsule), how much did you consume each time? (your best guess is okay)**

- |                       |                       |                       |                       |                       |
|-----------------------|-----------------------|-----------------------|-----------------------|-----------------------|
| Under 10mg<br>CBD     | 10 to 30 mg<br>CBD    | 31 to 60 mg<br>CBD    | 61 to 120<br>mg CBD   | Over 120mg<br>CBD     |
| <input type="radio"/> | <input type="radio"/> | <input type="radio"/> | <input type="radio"/> | <input type="radio"/> |

**9e. If you used topical cannabis products containing THC (i.e. skin creams or oils, patches, etc.), how much did you use each time? (your best guess is okay)**

- |                       |                        |                         |                        |                                       |
|-----------------------|------------------------|-------------------------|------------------------|---------------------------------------|
| Dime-sized<br>amount  | Nickel-sized<br>amount | Quarter-sized<br>amount | Loonie-sized<br>amount | More than a<br>Loonie-sized<br>amount |
| <input type="radio"/> | <input type="radio"/>  | <input type="radio"/>   | <input type="radio"/>  | <input type="radio"/>                 |

**9f. What percentage THC is the skin product you used?**

- |                       |                       |                       |                       |                       |
|-----------------------|-----------------------|-----------------------|-----------------------|-----------------------|
| less than 10%         | 10% to 15%            | 16% to 25%            | 26% to 35%            | More than 35%         |
| <input type="radio"/> | <input type="radio"/> | <input type="radio"/> | <input type="radio"/> | <input type="radio"/> |

**9g. If you used topical CBD only products (i.e. skin creams, patches, balms, etc.), how much would you say you used each time? (your best guess if okay)**

- |                       |                        |                         |                        |                                       |
|-----------------------|------------------------|-------------------------|------------------------|---------------------------------------|
| Dime-sized<br>amount  | Nickel-sized<br>amount | Quarter-sized<br>amount | Loonie-sized<br>amount | More than a<br>Loonie-sized<br>amount |
| <input type="radio"/> | <input type="radio"/>  | <input type="radio"/>   | <input type="radio"/>  | <input type="radio"/>                 |

**9h. What percentage CBD is the skin product you used?**

- |                       |                       |                       |                       |                       |
|-----------------------|-----------------------|-----------------------|-----------------------|-----------------------|
| less than 10%         | 10% to 15%            | 16% to 25%            | 26% to 35%            | More than 35%         |
| <input type="radio"/> | <input type="radio"/> | <input type="radio"/> | <input type="radio"/> | <input type="radio"/> |

**9i. If you used shatter, budder, hash, oil, rosin or other concentrated products, how much would you say you used each time? (your best guess is okay)**

- |                                         |                                 |                               |
|-----------------------------------------|---------------------------------|-------------------------------|
| Less than 1/8 gram<br>(1-3 rice grains) | 1/8 - 1/4 to gram<br>(mini M&M) | More than<br>1/4g. (mini M&M) |
| <input type="radio"/>                   | <input type="radio"/>           | <input type="radio"/>         |
